# Supplementary material for: Sxl-Dependent, tra/tra2-Independent Alternative Splicing of the Drosophila melanogaster X-Linked Gene found in neurons
Source: PubMed Central journal article supplement (PMC4683657; doi:10.1534/g3.115.023721), 2015-10-26

\* dsx

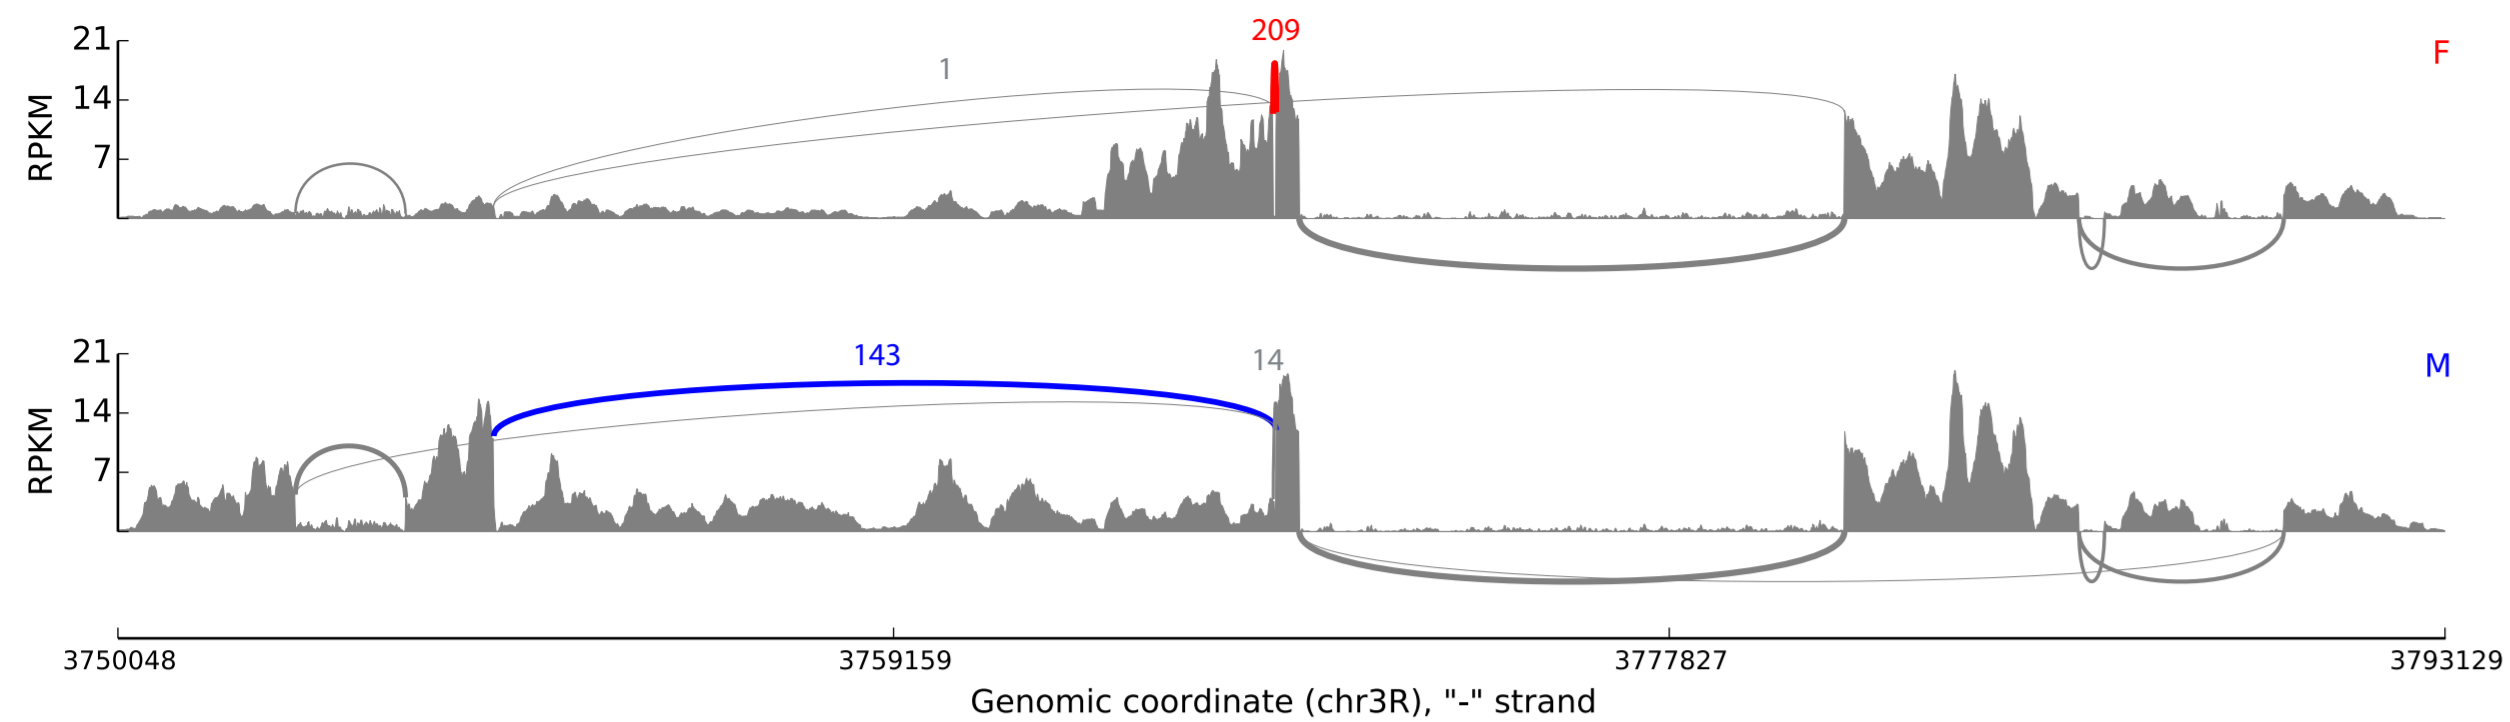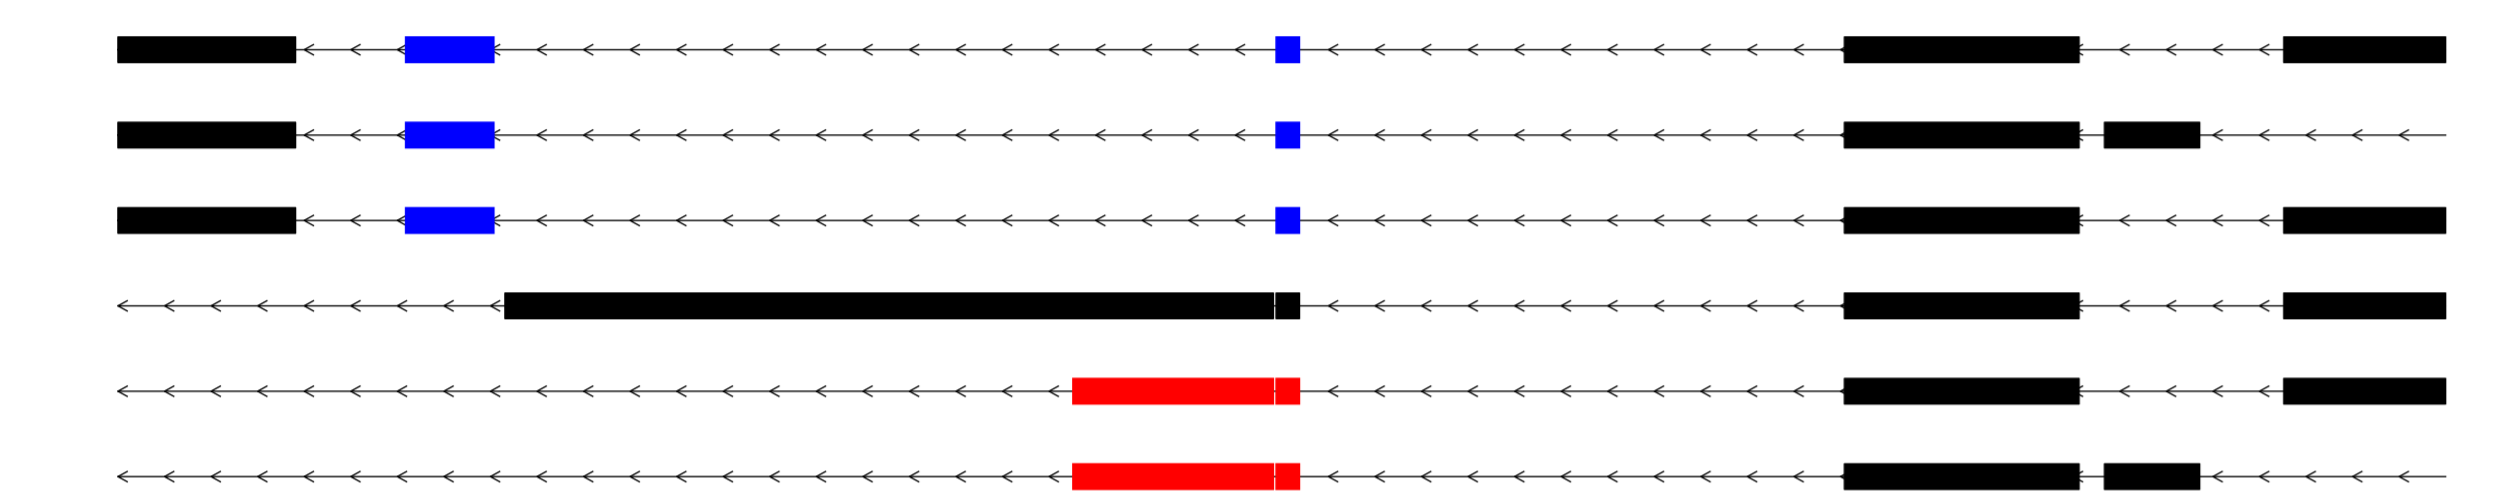

\* fru

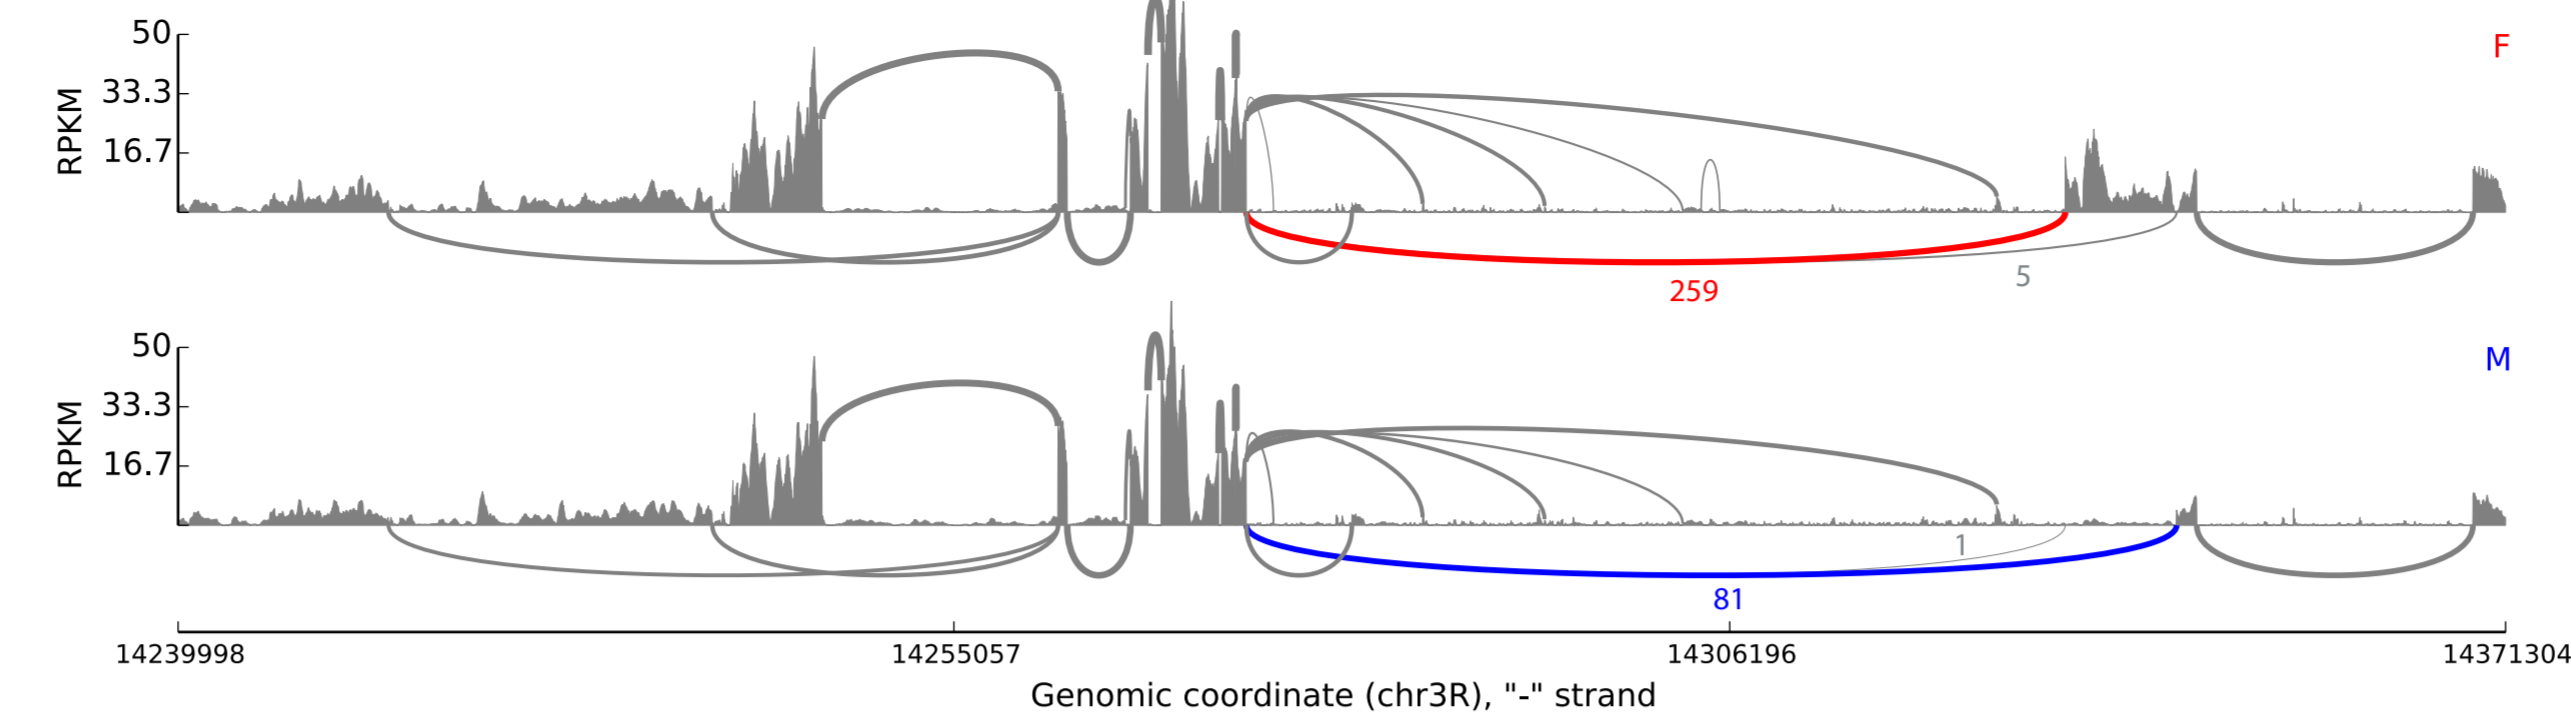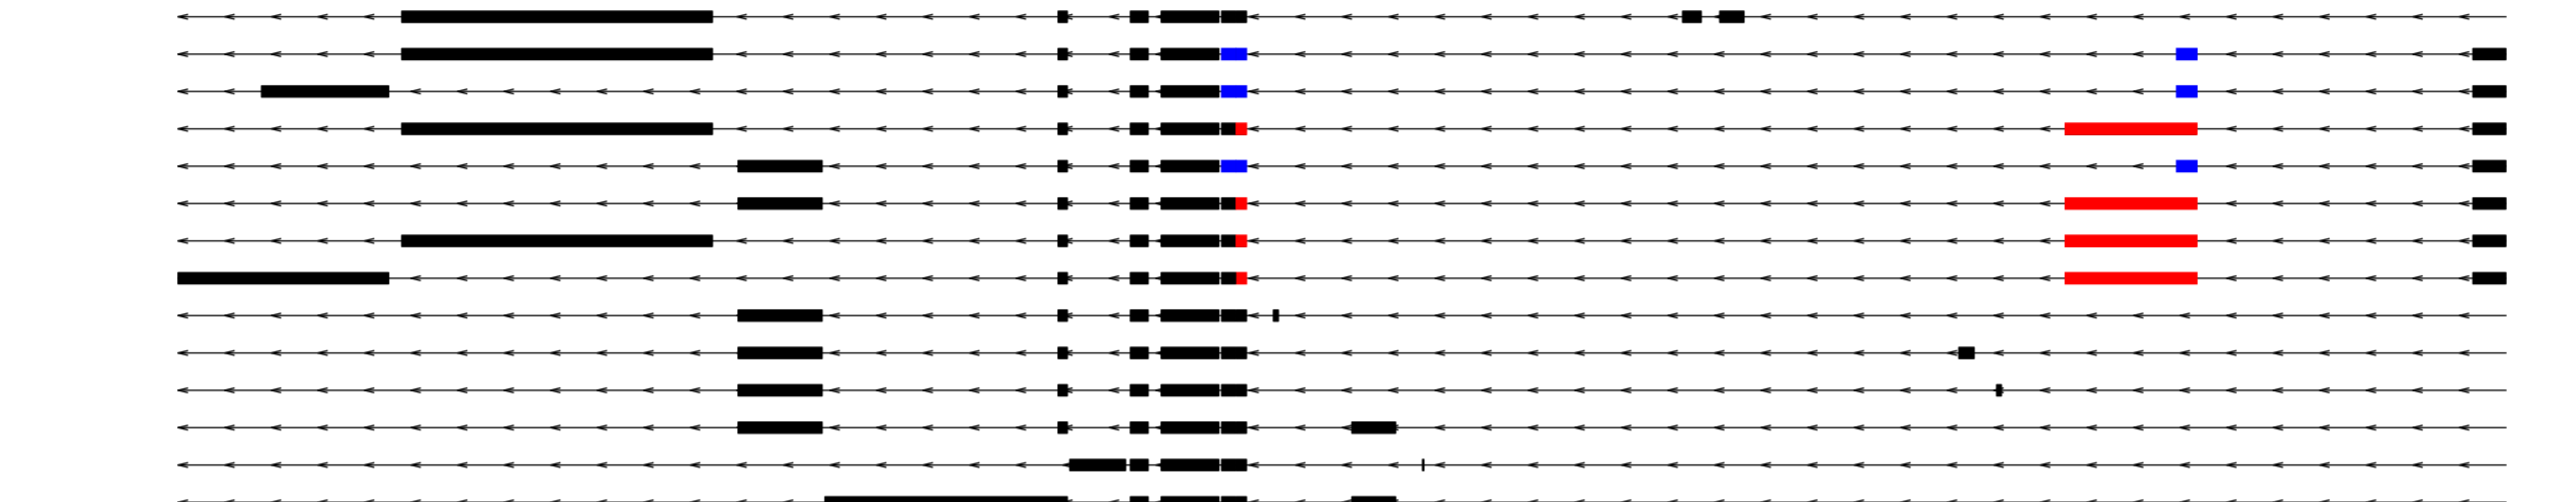

\* Sxl

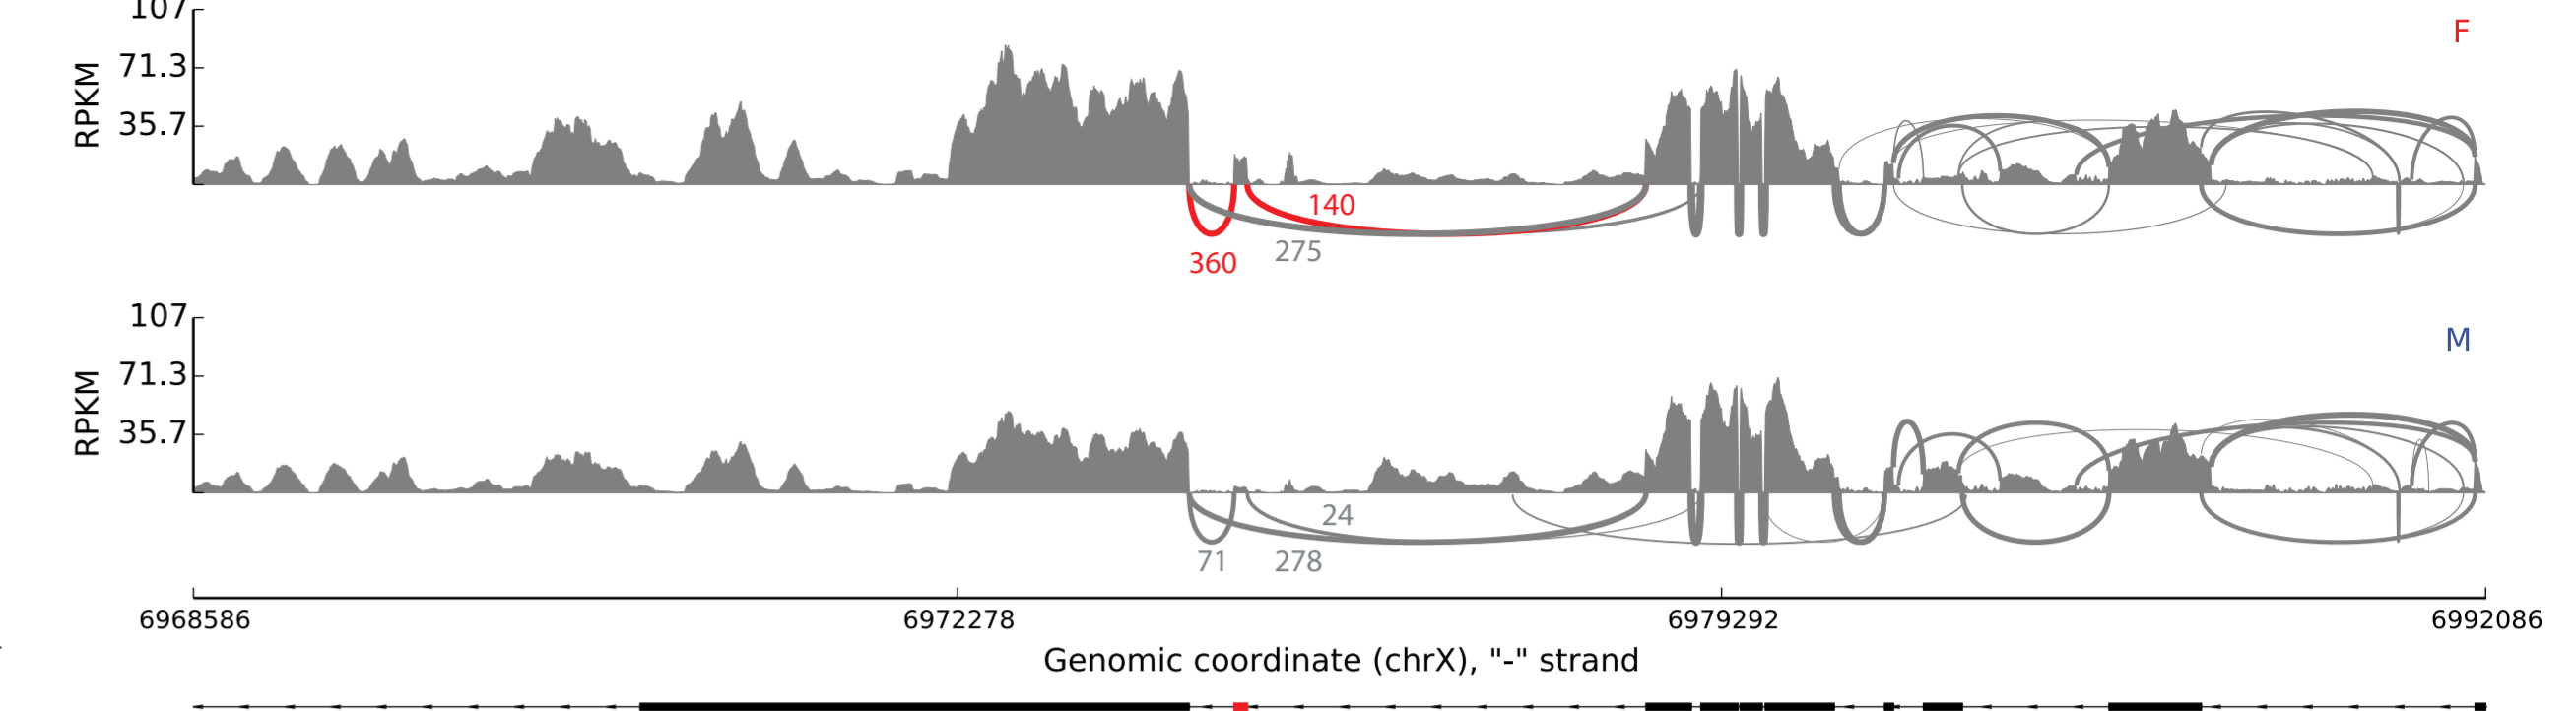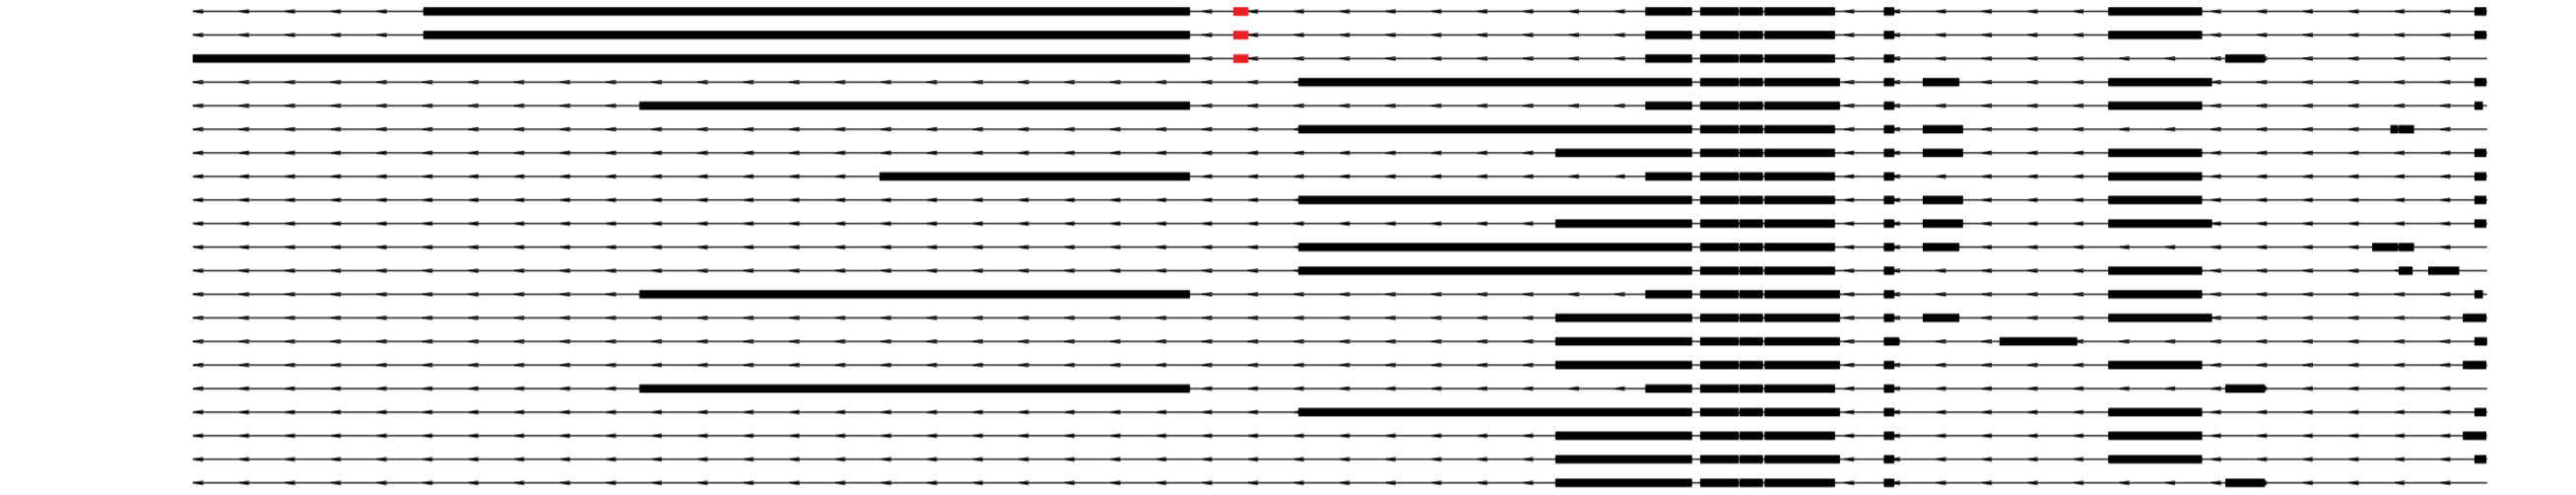

tango13

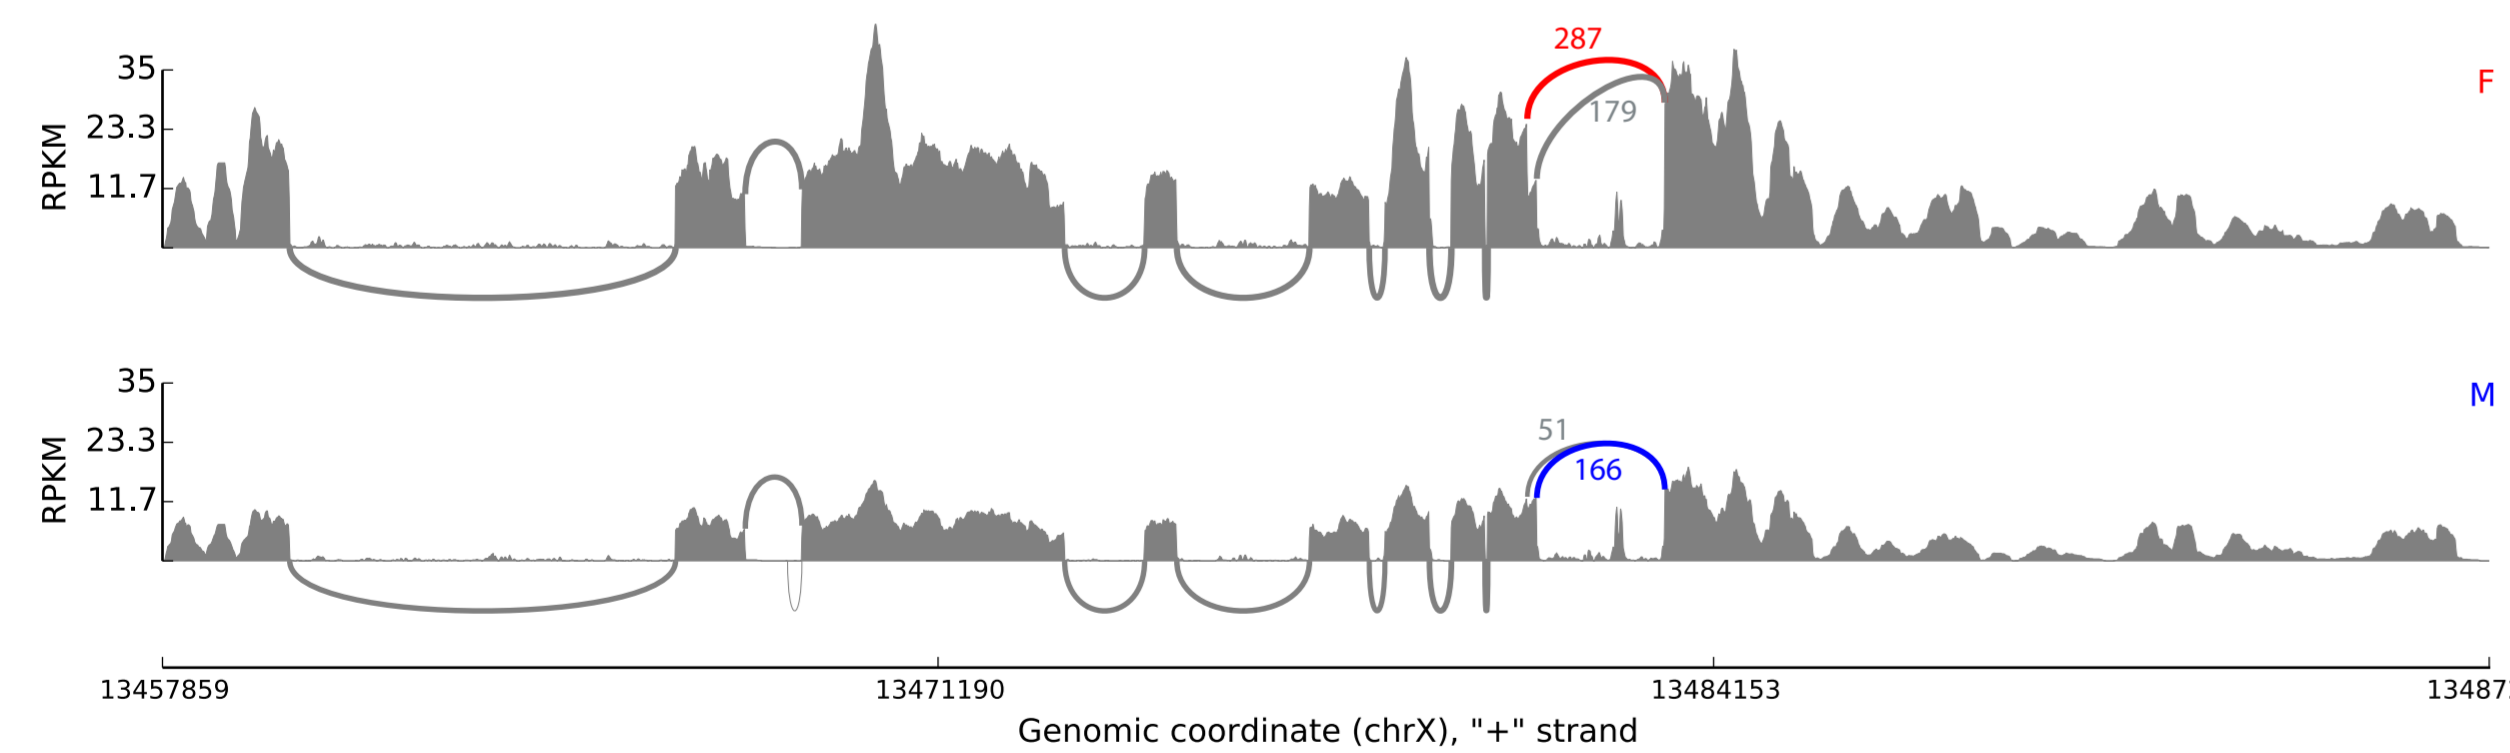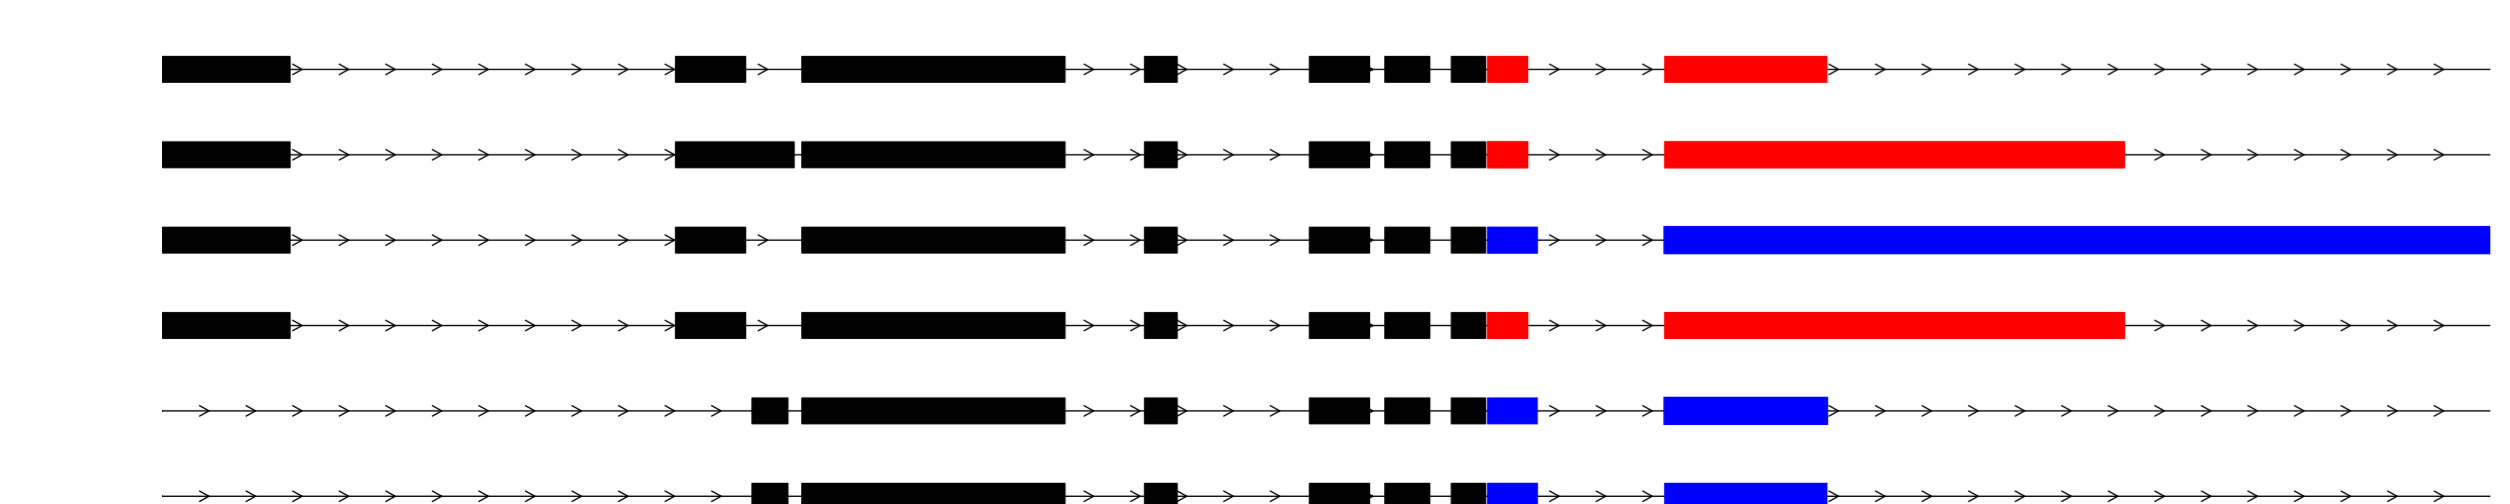

regucalcin

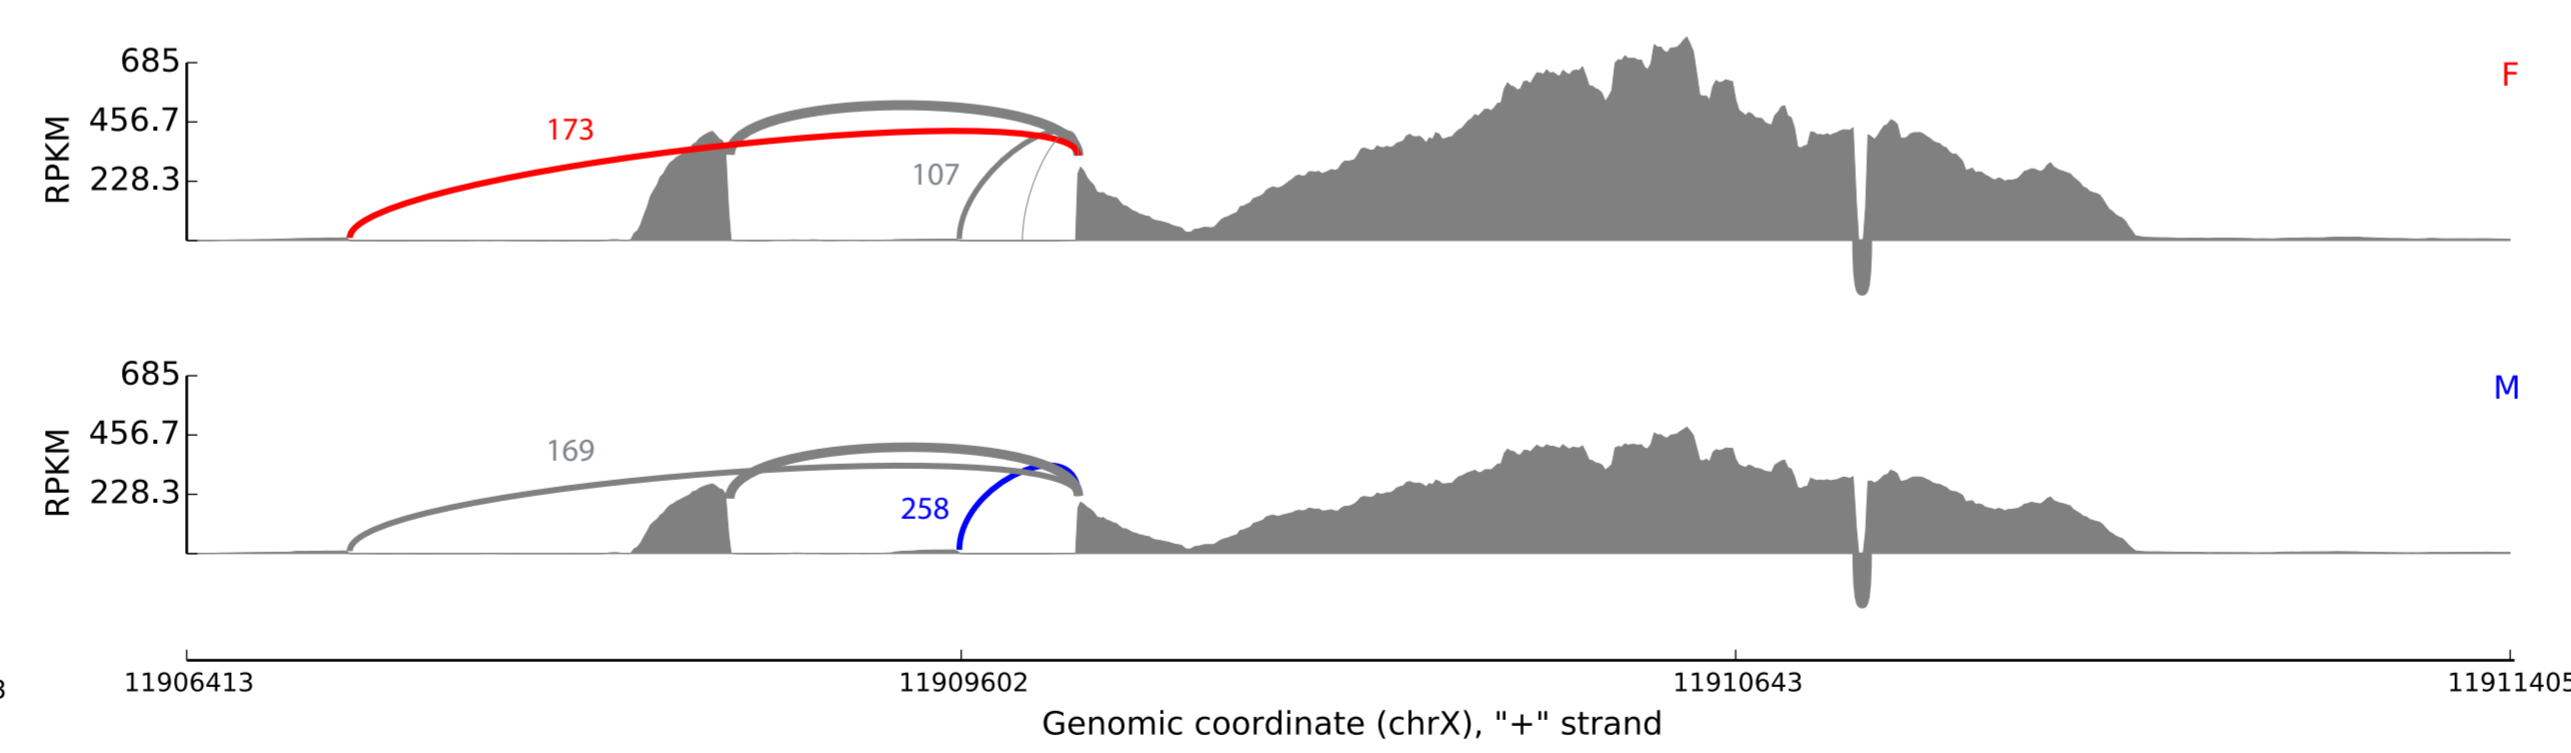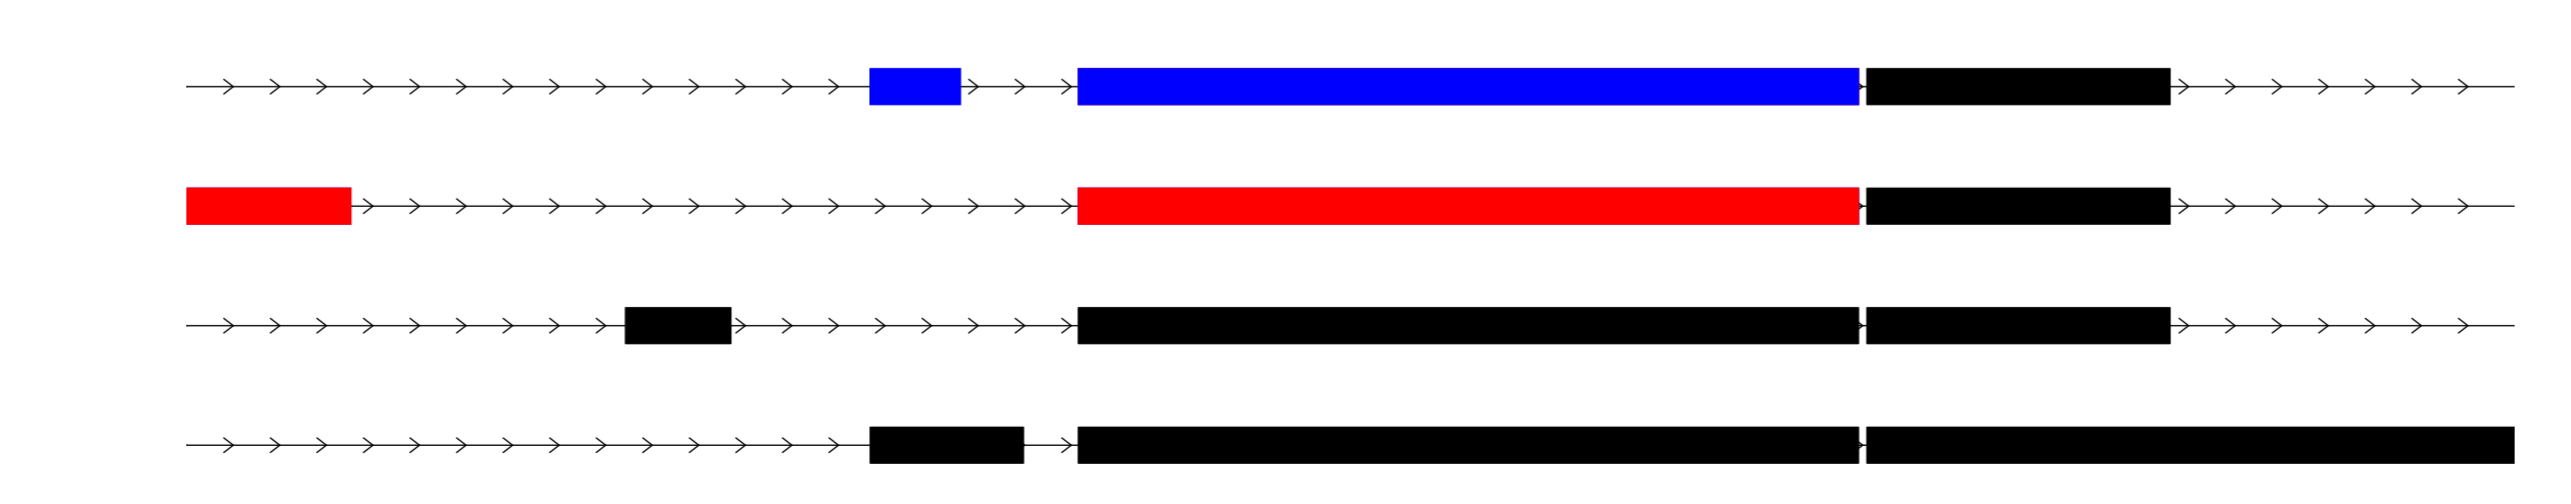

\* fbp

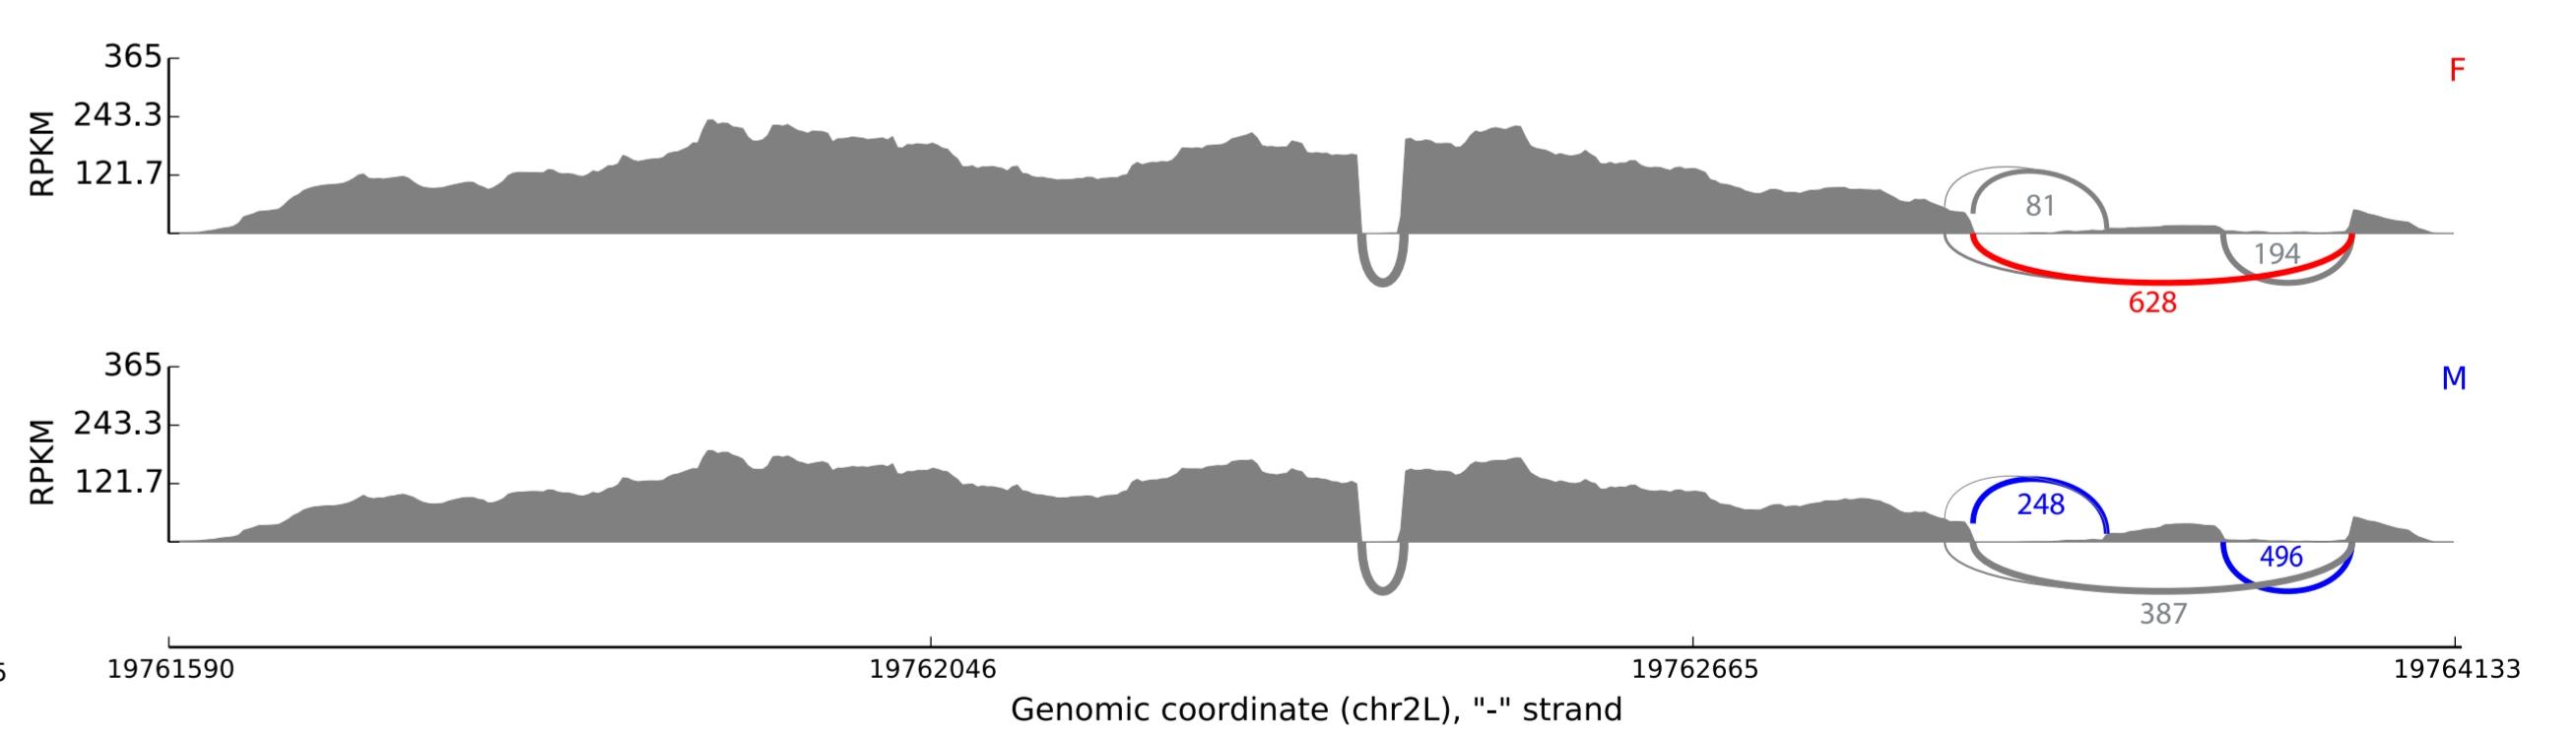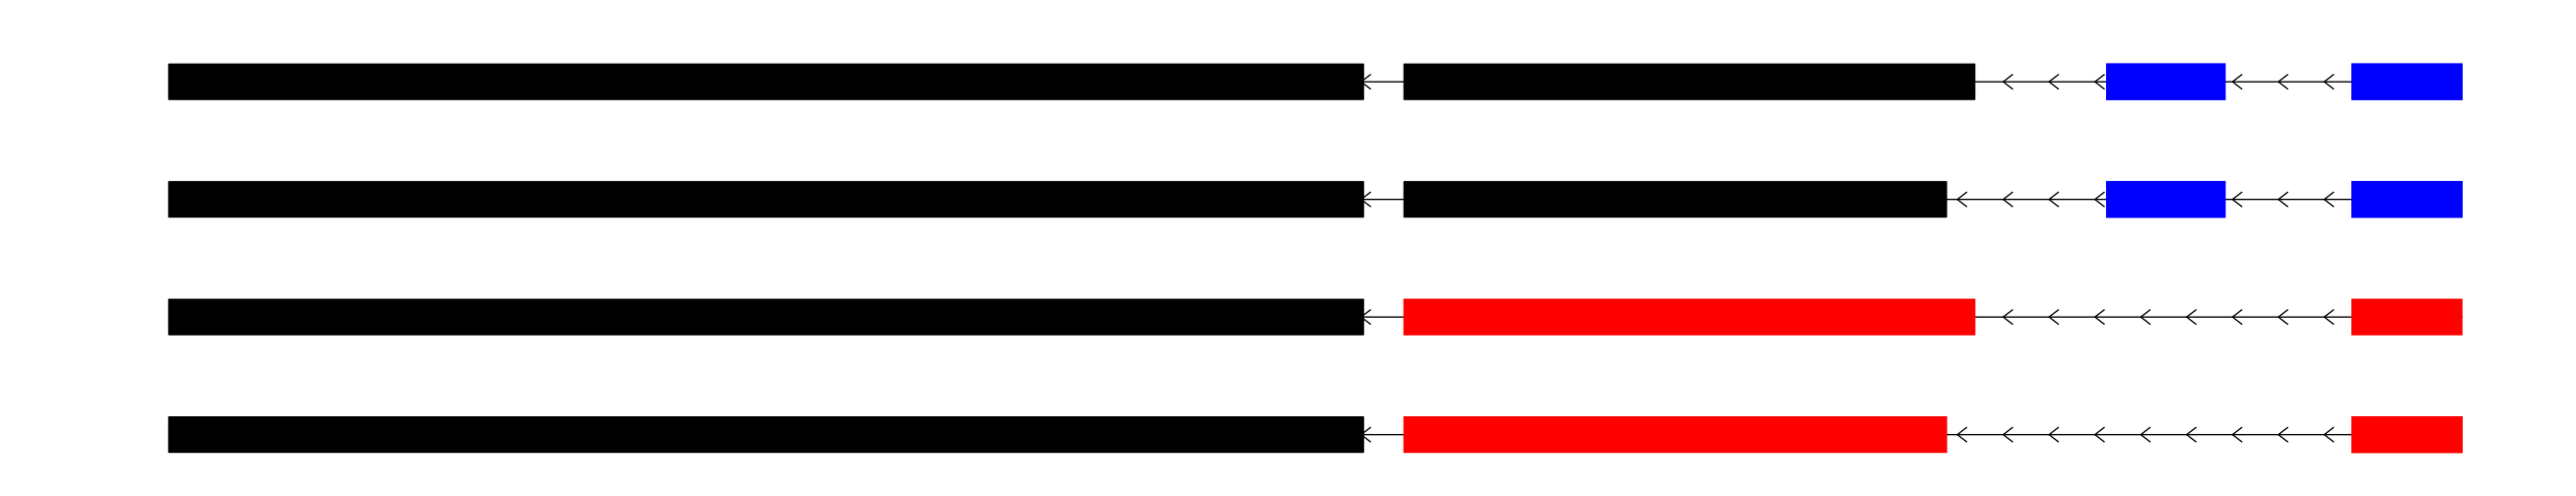

Supplement: supp_g3.115.023721_Figure_S1.pdf [file supp_g3.115.023721_Figure_S1.pdf]
